# Supplementary material
Source: Springer Nature journal article supplement (https://www.springermedizin.de/resource/supplementary/13014_2012_574_MOESM1_ESM.pdf/9633768)

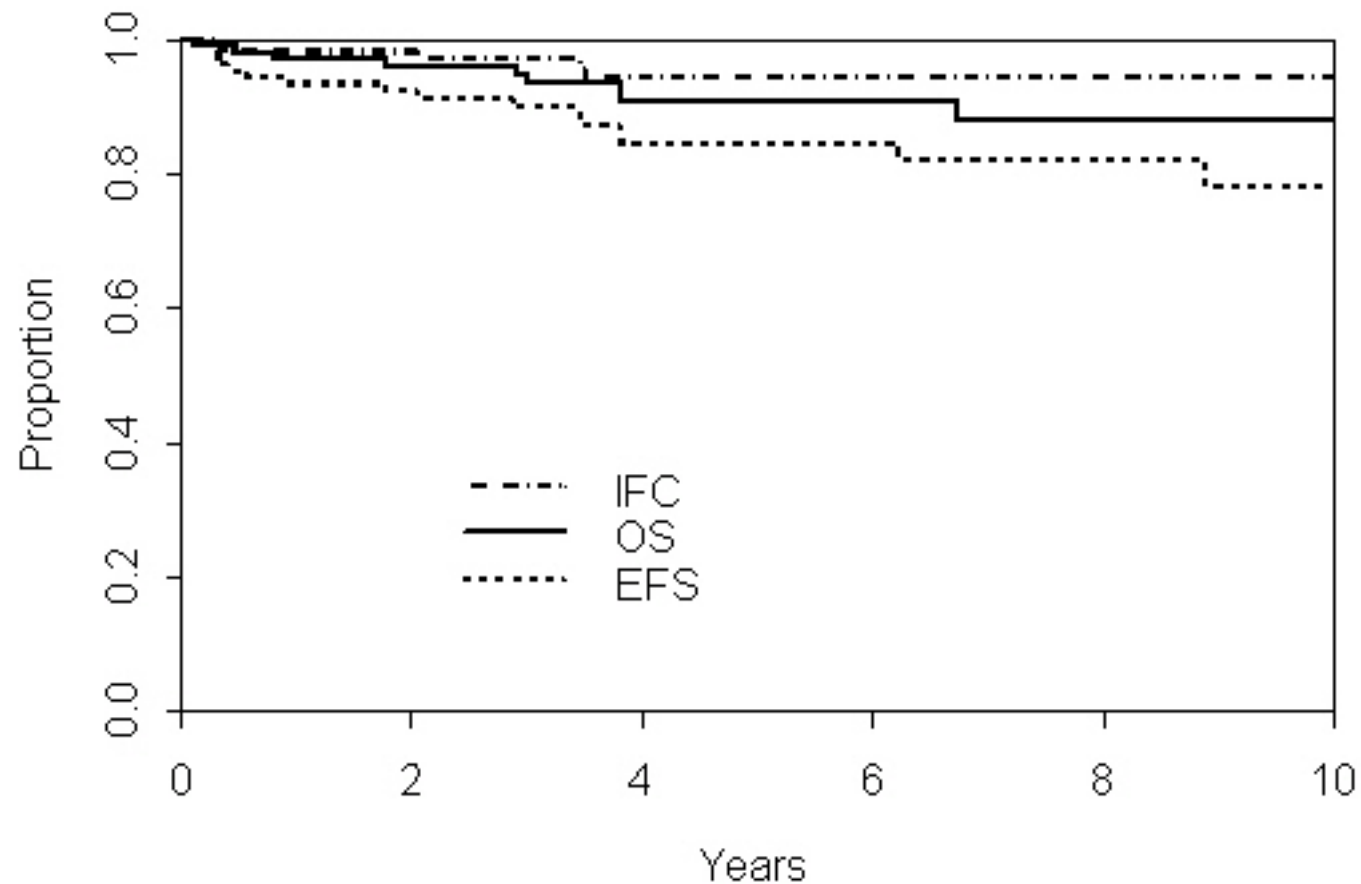

Number at Risk (Overall Survival)

105

87

62

39

28

13

Supplement: MOESM1 [file 9633768]
